# Supplementary material
Source: publisher site journal article supplement (https://spandidos-publications.com/6304/downloadSupplementary)

Figure S1. Ultraviolet standard curve of DOX in aqueous solution. The DOX concentrations used were 0.3125, 0.625, 1.25, 2.5, 5, 10, 20, 40 and 50 mg/l. DOX, doxorubicin.

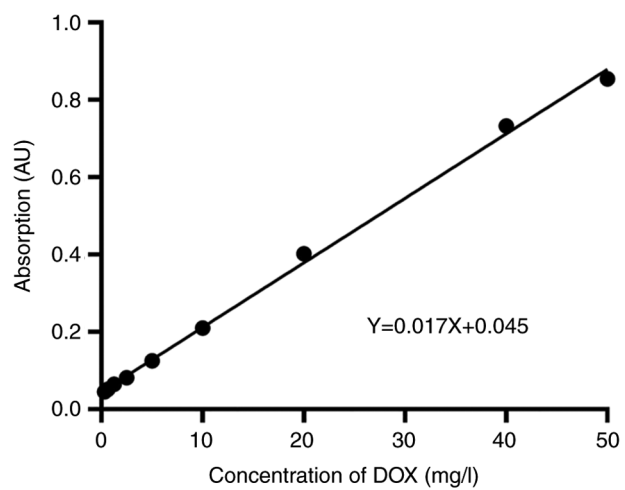

Supplement: Supplementary file 1 [file downloadSupplementary]
